# Supplementary material
Source: Frontiers journal article supplement (https://www.frontiersin.org/articles/161148)
Supplement: Image_1.PDF [file Image_1.PDF]

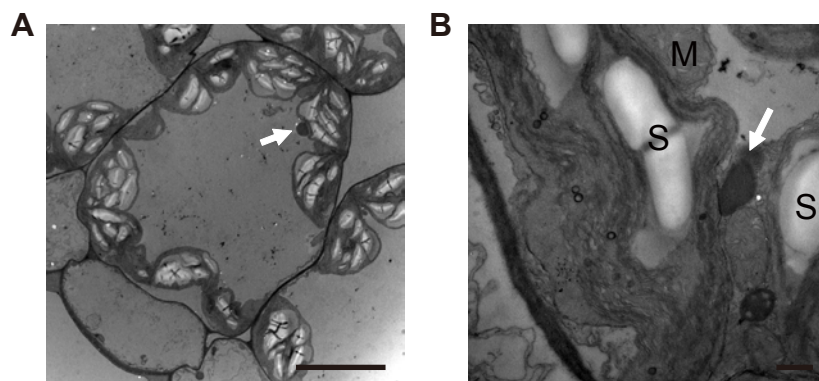

Supplementary Figure 1 Shimojima et al. FPS
